# Supplementary material
Source: PubMed Central journal article supplement (PMC3504730)

## Supplemental data

### Supplemental Figure legends

**Supplemental Figure 1. Monocytes are major sources of infiltrated leukocytes in early NASH.** (A) Gating strategy of flow cytometry. (B) Frequency of neutrophils (CD11b<sup>hi</sup>F4/80<sup>+</sup>), monocytes (CD11b<sup>int</sup>F4/80<sup>low</sup>) and Kupffer cells (CD11b<sup>+</sup>F4/80<sup>hi</sup>) are shown in CD45<sup>+</sup>NK1.1<sup>-</sup>-gated whole liver cells isolated from CT diet- and MCD diet-fed mice. Data are representative of at least four independent experiments with a total of n=8 mice per condition. (C) No change in frequency and cell numbers of T, NK, and NKT cells in C57BL/6 mice fed with MCD diet compared to ones fed with control diet. FACS plots, frequency and cell numbers of T cells (CD3<sup>+</sup>NK1.1<sup>-</sup>), NK cells (CD3<sup>-</sup>NK1.1<sup>+</sup>), and NKT cells (CD3<sup>+</sup>NK1.1<sup>+</sup>) are shown in CD45<sup>+</sup> total liver cells isolated from mice fed with CT and MCD diet for 10 days. Data are representative of three independent experiments with n=2 per condition. \*p<0.05 and \*\*p<0.005 as determined by two-tailed *t* test.

**Supplemental Figure 2. Increase of hepatic inflammation after 10 days of MCD diet.** (A) Hepatic *Ptgs2* (encodes for COX-2) and *Timp-1* (early marker for fibrosis) transcript expressions were determined by qPCR from liver samples of CT diet- and MCD diet-fed mice. The RNA level is expressed as fold increase compared with control diet. (B) Dosage of chemokine/cytokine from whole liver cell lysates of CT diet- and MCD diet-fed mice was determined by luminex assays. These results are compiling data from three independent experiments with a total of n=3 to 7 mice per condition. (C) Multiplex luminex assays for chemokines/cytokines were performed on the culture supernatants of electronically sorted monocytes (CD45<sup>+</sup>NK1.1<sup>-</sup>CD11b<sup>int</sup>F4/80<sup>low</sup>) and Kupffer cells (CD45<sup>+</sup>NK1.1<sup>-</sup>CD11b<sup>low</sup>F4/80<sup>hi</sup>) purified from mononuclear liver cells extracted from CT diet and MCD diet fed mice. Compiled data from 3 independent experiments with a total of n=6 to 8 mice. Statistical analysis was determined two-tailed *t* test (\*p<0.05; \*\*p<0.005 and \*\*\* p<0.0005).

**Supplemental Figure 3. Clodronate-liposomes treatment did not deplete bone marrow and blood monocytes.** CT and MCD-fed C57BL/6 mice were treated once either with control liposomes (CT Lipo.) or clodronate-containing liposomes (clod. Lipo.) at 2 days before (A) or 5 days after (B) starting feeding. The frequency of Ly6C<sup>hi</sup> and Ly6C<sup>low</sup> from bone marrow (BM) and blood are assessed by flux cytometry by staining of cells with CD45, NK1.1, Ly6G, CD11b, Ly6C, and F4/80.

Tosello-Tramont *et al.*, Supplemental Figure 1

**A**

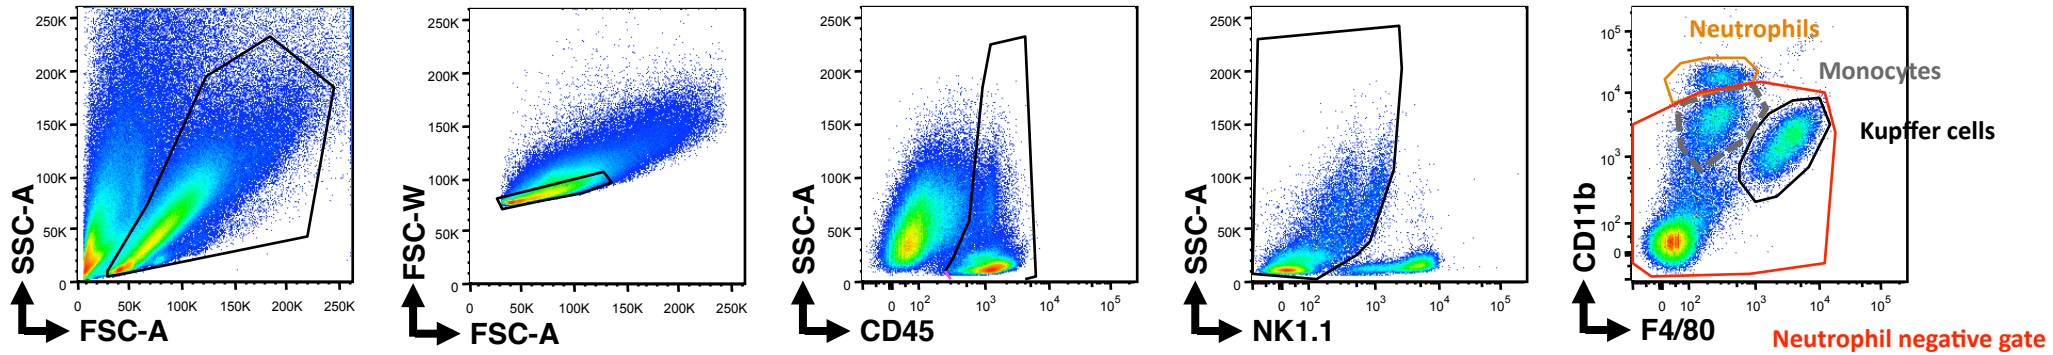

**B**

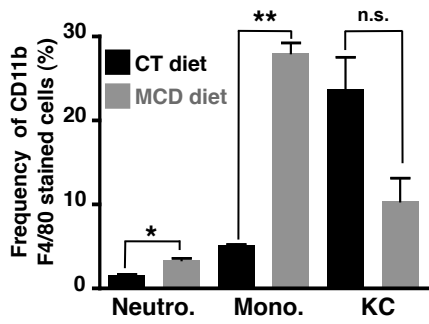

**C**

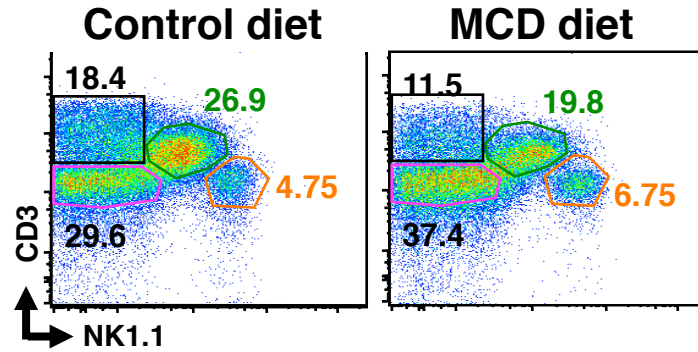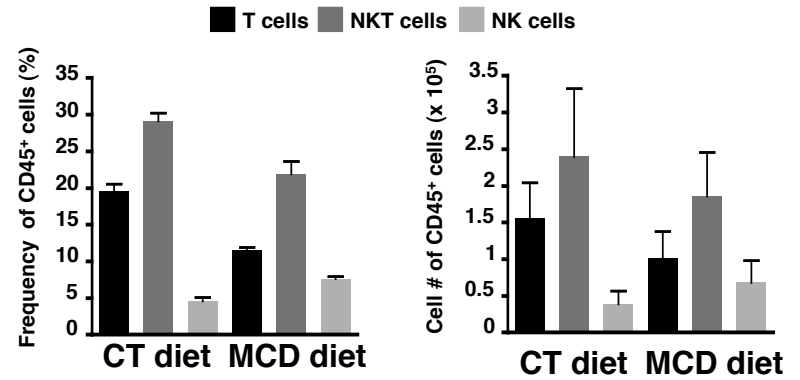

Tosello-Trampont *et al.*, Supplemental Figure 2

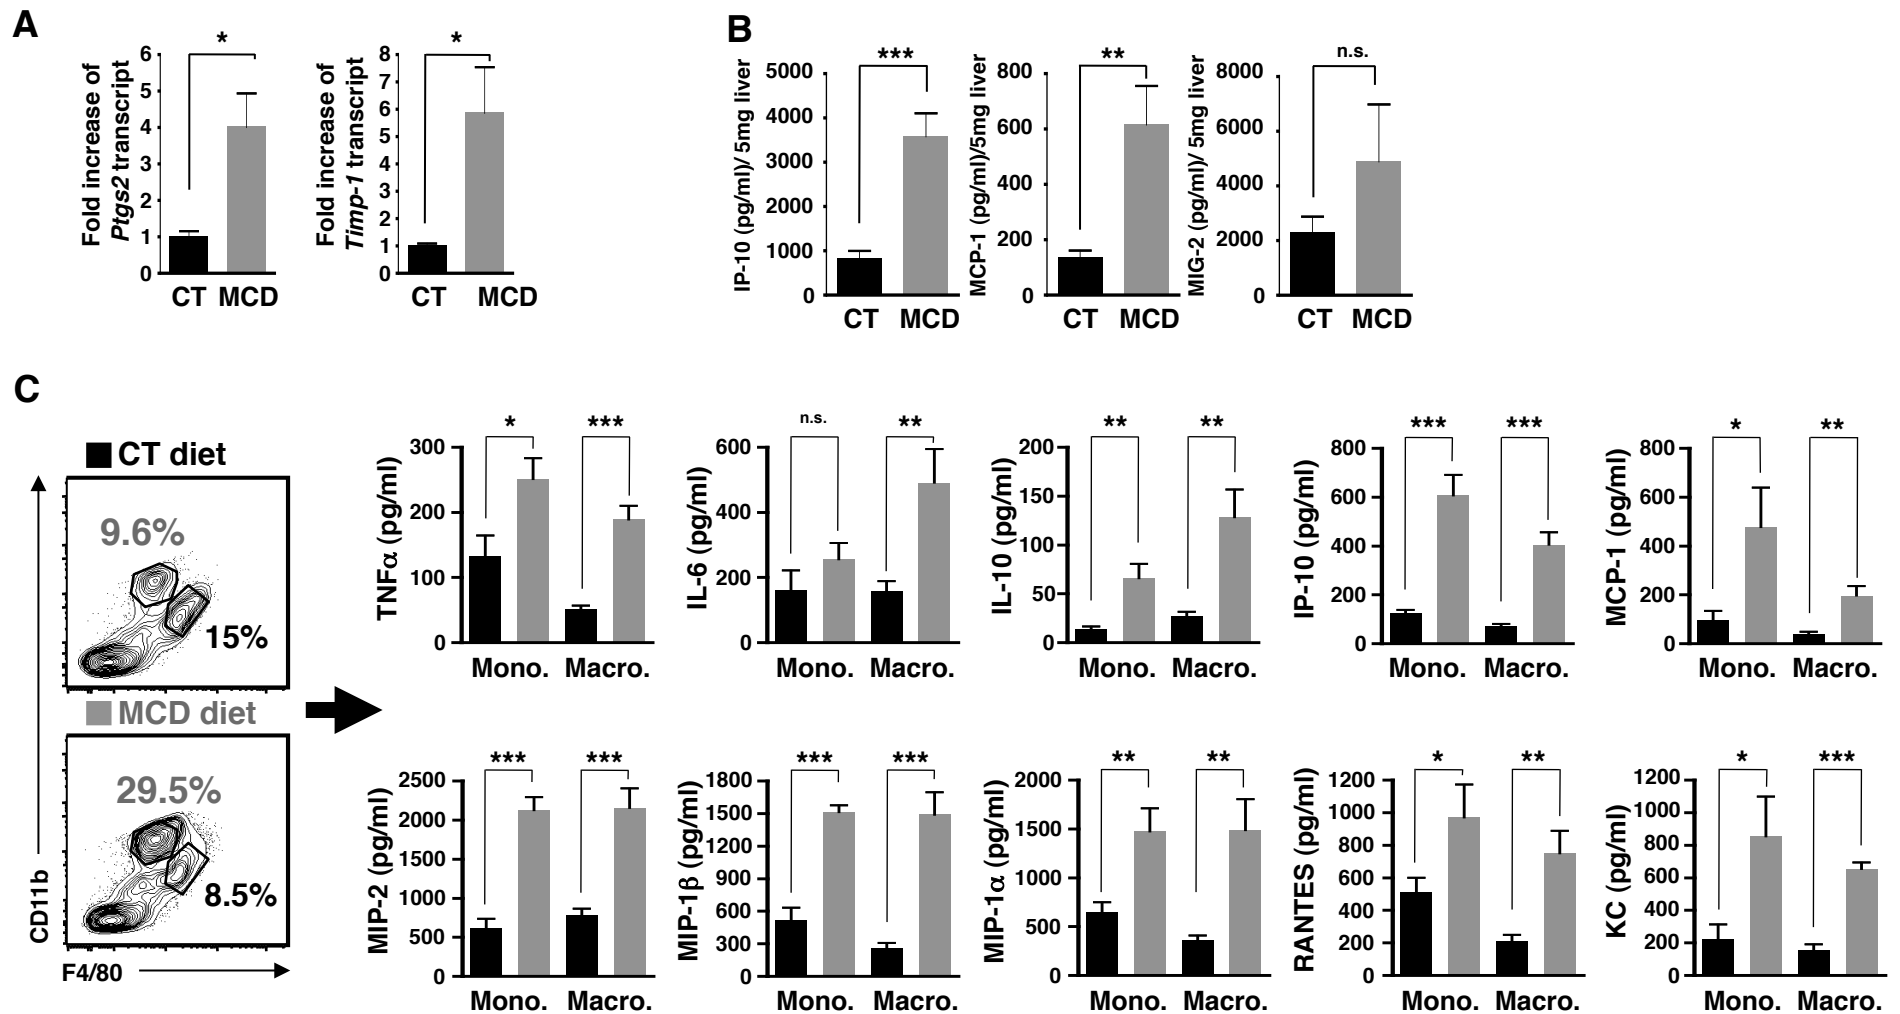

Tosello-Tramont *et al.*, Supplemental Figure 3

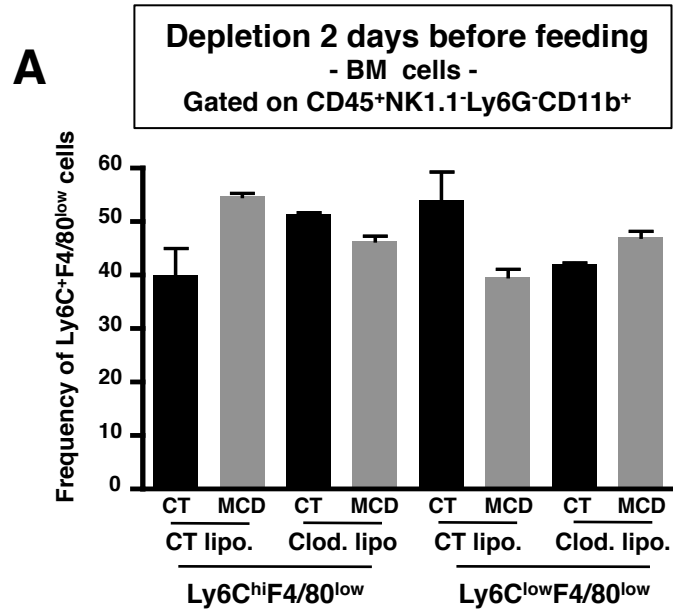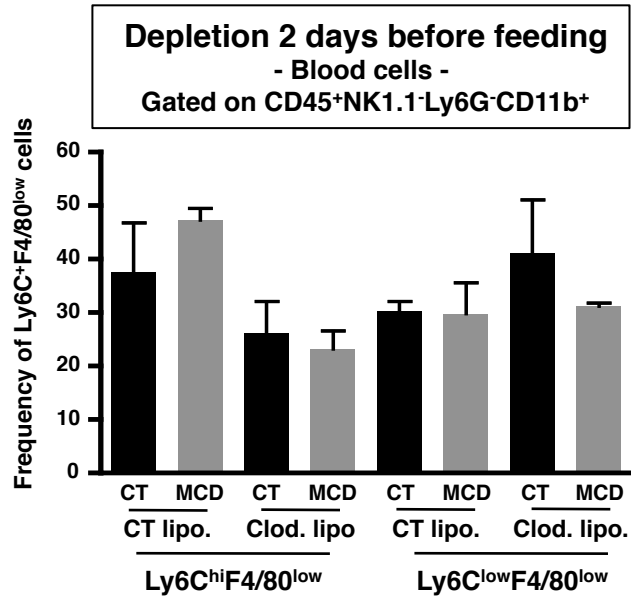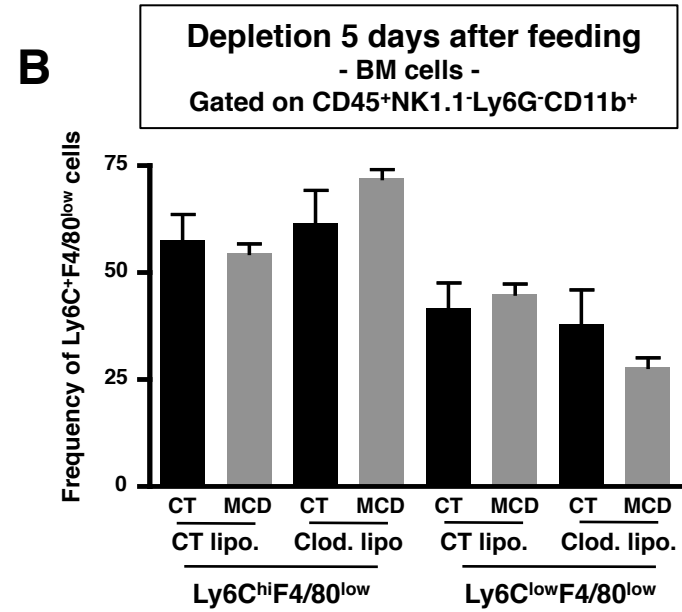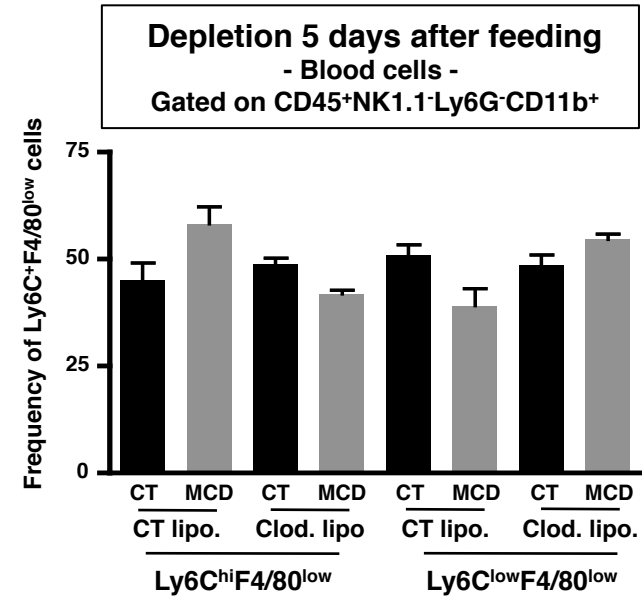

Supplement: supp_M112.417014_jbc.M112.417014-1.pdf [file supp_M112.417014_jbc.M112.417014-1.pdf]
